# Supplementary material for: Interplay between CCR7 and Notch1 axes promotes stemness in MMTV-PyMT mammary cancer cells
Source: Springer Nature journal article supplement (doi:10.1186/s12943-017-0592-0), 2017-01-23

**Additional file**

**Interplay between CCR7 and Notch1 axes promotes stemness in MMTV-PyMT mammary cancer cells.**

**Sarah T. Boyle, Krystyna A. Gieniec, Carly E. Gregor, Jessica W. Faulkner, Shaun R. McColl, Marina Kochetkova**

### **Figure S1. CCR7 does not regulate expression of Notch ligands**

(a) Representative gating strategy for the delineation of the stem cell-enriched CD24<sup>+</sup>CD29<sup>hi</sup> population as used in this project. Within each experiment, the CD24<sup>+</sup>CD29<sup>hi</sup> population was either analyzed further by flow cytometric analysis, or sorted by FACS from the bulk tumor to analyze by Western or qPCR. (b-c) PyMT-*Ccr7*<sup>WT</sup> and *Ccr7*<sup>-/-</sup> mammary tumors were analyzed by multi-color flow cytometry for expression of Notch ligands within the CD24<sup>+</sup>CD29<sup>hi</sup> stem cell-enriched population. Top=representative flow cytometry histograms, bottom=quantification. (b) Cell surface expression of Notch ligand DLL1 in the PyMT-*Ccr7*<sup>WT</sup> and *Ccr7*<sup>-/-</sup> mammary stem cell-like population. (c) Cell surface expression of Notch ligand Jagged1 in the PyMT-*Ccr7*<sup>WT</sup> and *Ccr7*<sup>-/-</sup> mammary stem cell-like population. (b-c) n=4 mice/genotype. FMO=fluorescence minus one, MFI=mean fluorescence intensity.

### **Figure S2. Notch does not regulate expression of CCR7 or its ligands in mammary cancer stem cell-enriched culture**

(a) Relative mRNA levels of Hes1 in PyMT-*Ccr7*<sup>WT</sup> secondary mammospheres cultured with or without  $\gamma$ -secretase inhibitor RO4929097 to block Notch activation. (b) Relative mRNA levels of CCR7 in secondary mammospheres derived from PyMT-*Ccr7*<sup>WT</sup> mammary tumors, cultured with or without RO4929097. (c) Cell surface expression of CCR7 on secondary mammospheres derived from PyMT-*Ccr7*<sup>WT</sup> mammary tumors, cultured with or without RO4929097, as assessed by flow cytometry of mammosphere cells. Top=representative flow cytometry histograms, bottom=quantification. FMO=fluorescence minus one, MFI=mean fluorescence intensity. (d) Relative mRNA levels of CCR7 ligands CCL19 (left) and CCL21 (right) in secondary mammospheres derived from PyMT-*Ccr7*<sup>WT</sup> mammary tumors, cultured with or without RO4929097. (a-d) n=6 mice/experiment.

**Figure S3. Wnt signaling inhibition does not affect the ability of CCR7 to stimulate mammosphere formation.**

Mammosphere-forming efficiency (number of spheres/cells seeded) of PyMT-*Ccr7*<sup>WT</sup> primary mammary tumor cells cultured with and without chemokine CCL21 and Wnt inhibitor XAV-939. n=6 mice/experiment.

**Figure S4. Correlation of CCR7 and Notch1 expression in primary human breast cancer.**

CCR7 and Notch1 expression in various grades of breast cancer, analyzed using a published dataset available in OncoPrint, consisting of 2,000 primary breast cancers. Significant associations were identified using Pearson correlation coefficients.

# SUPPLEMENTARY FIGURE 1

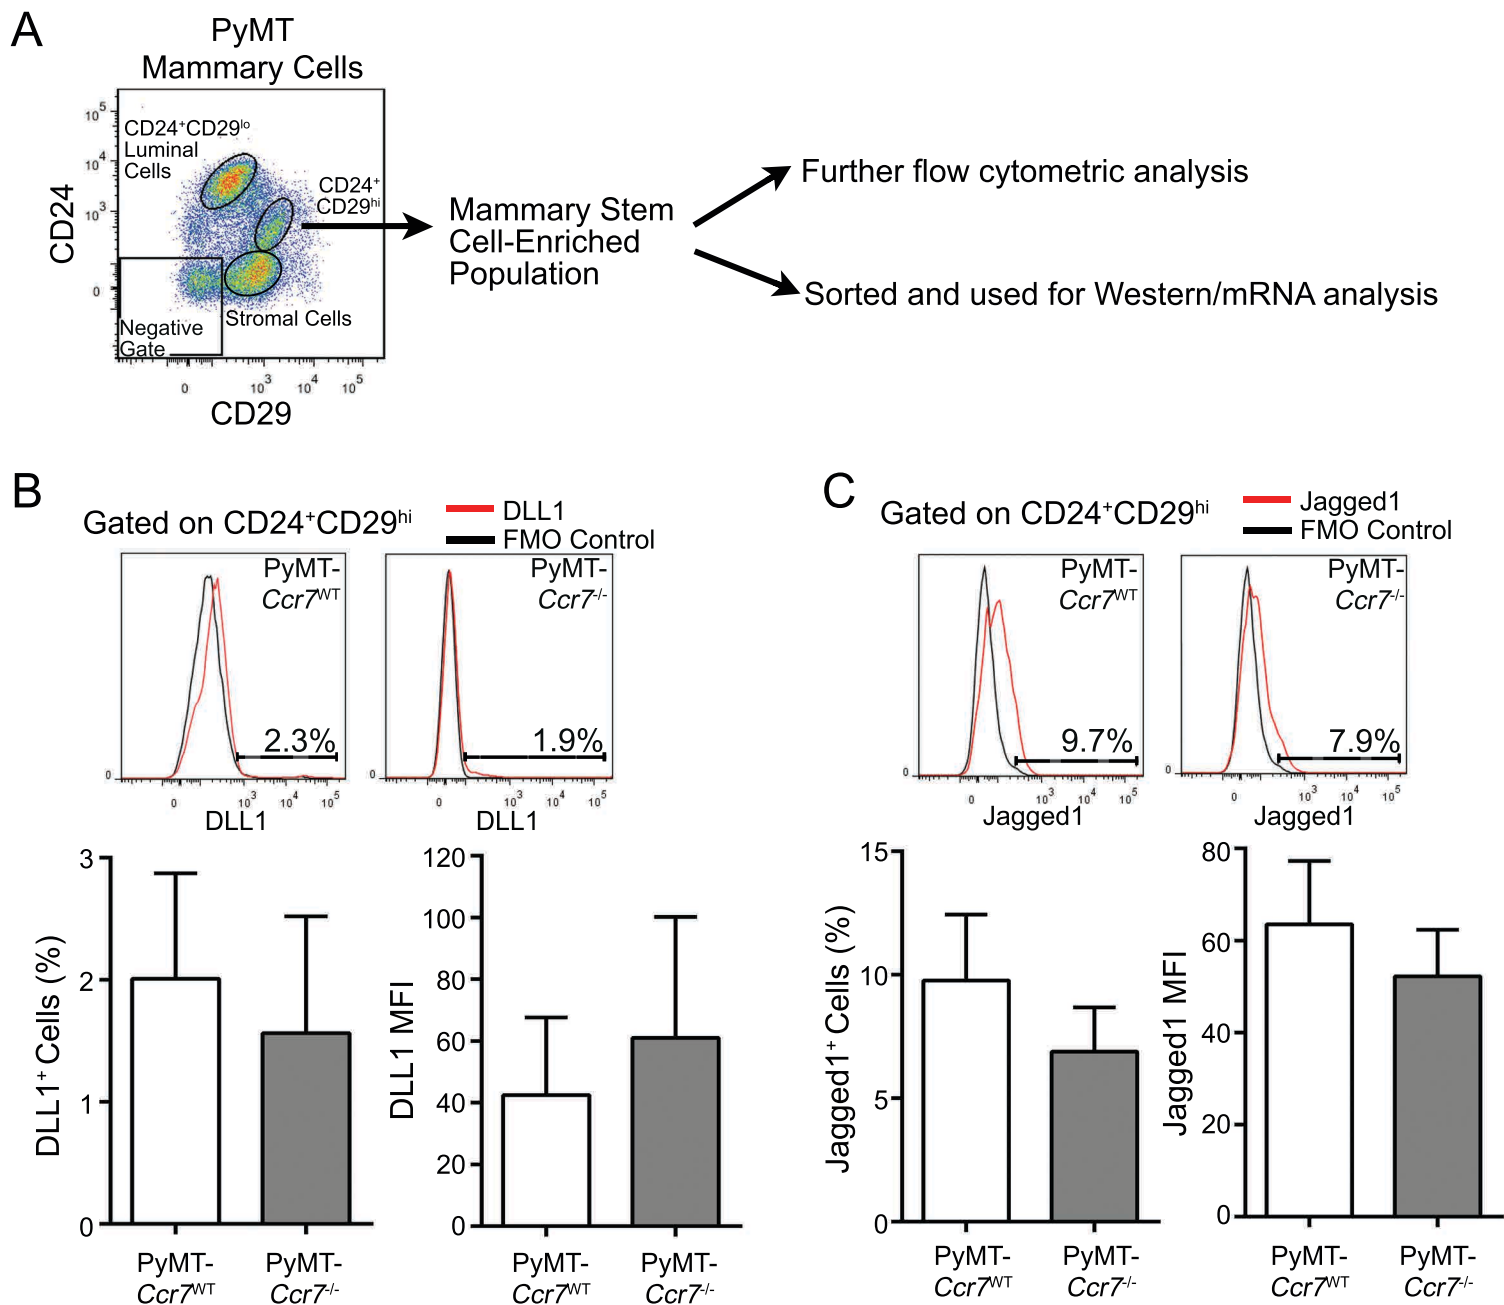



# SUPPLEMENTARY FIGURE 2

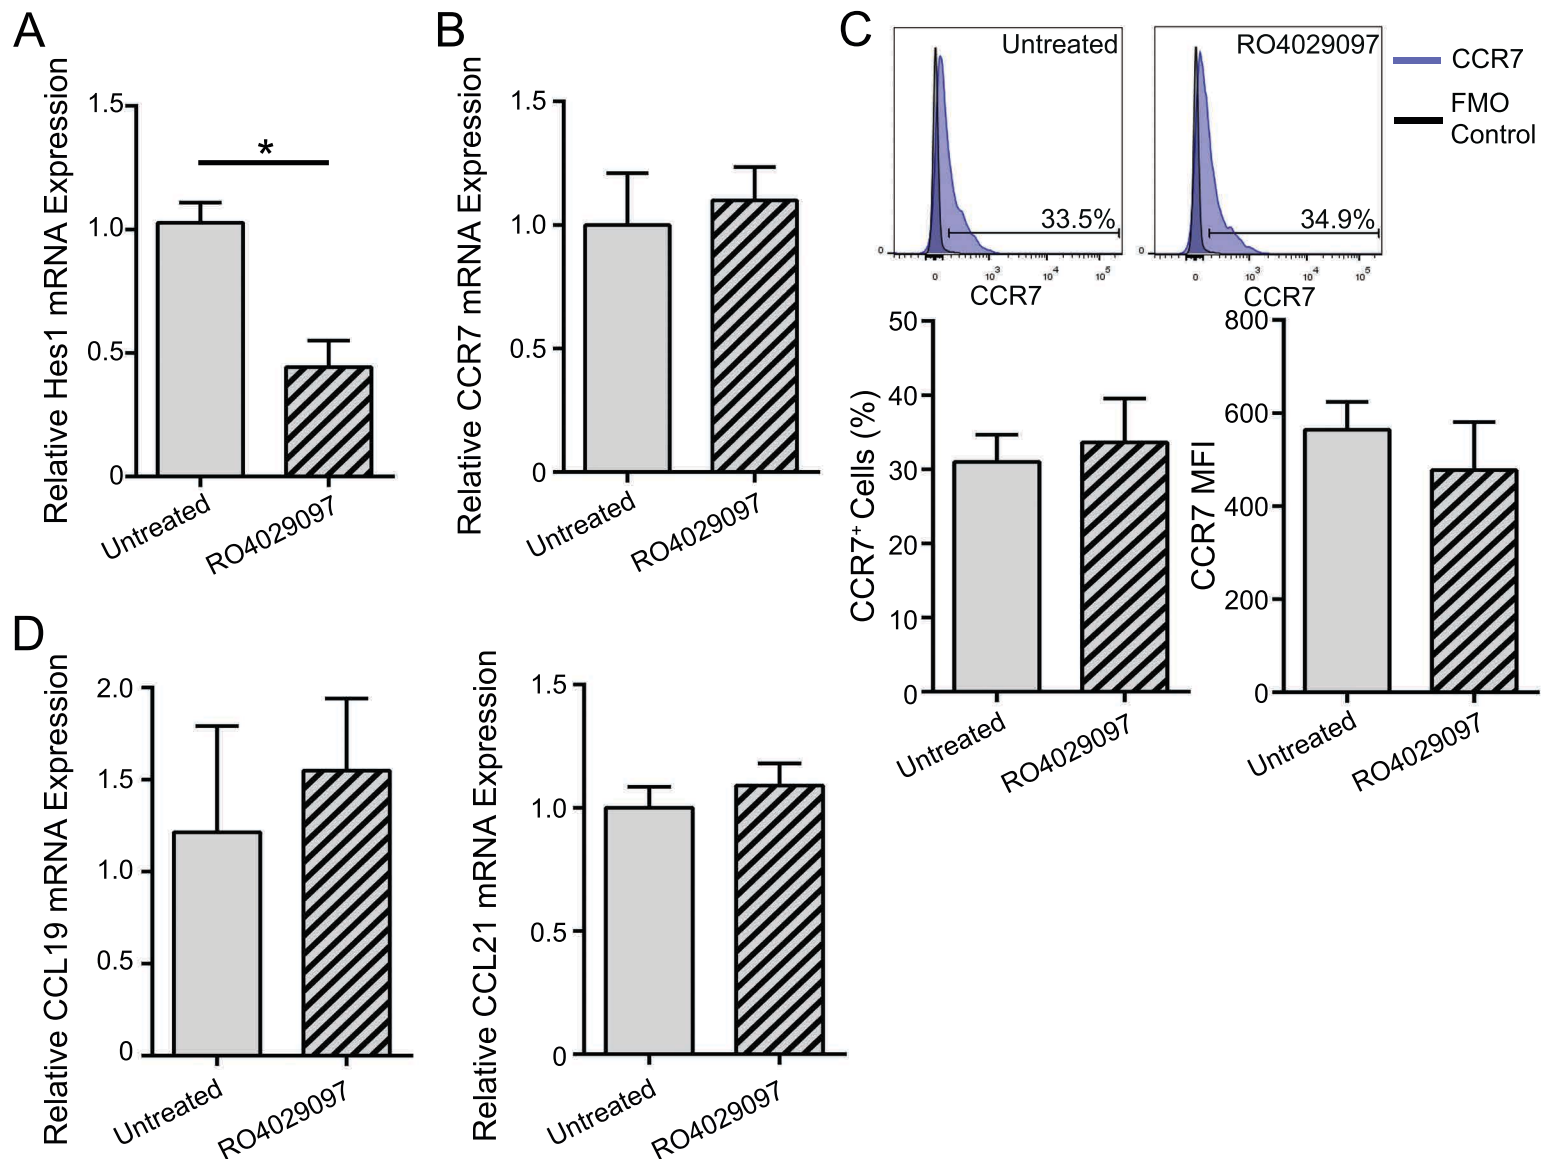

# SUPPLEMENTARY FIGURE 3

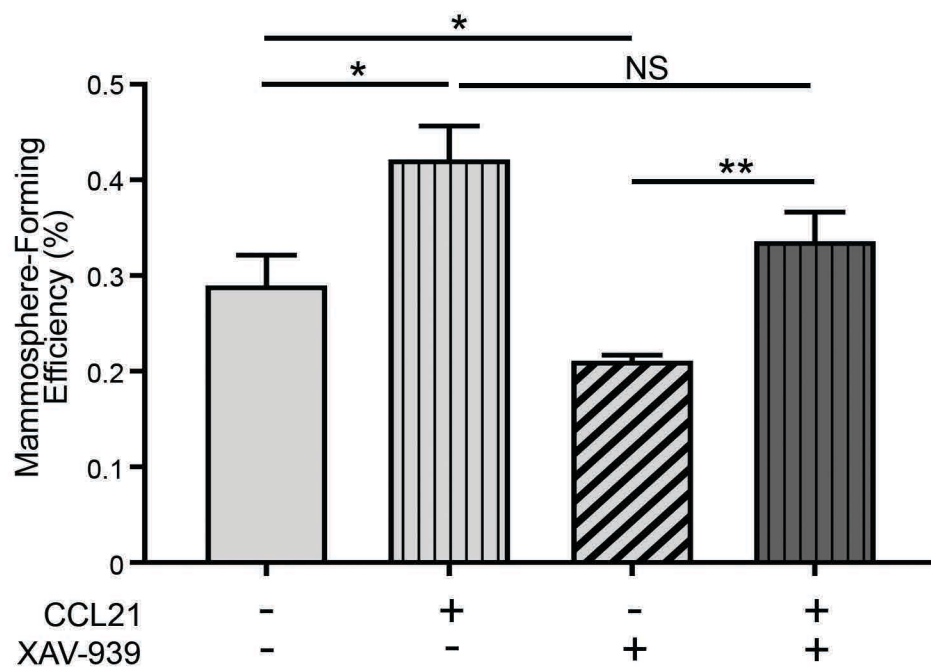

# SUPPLEMENTARY FIGURE 4

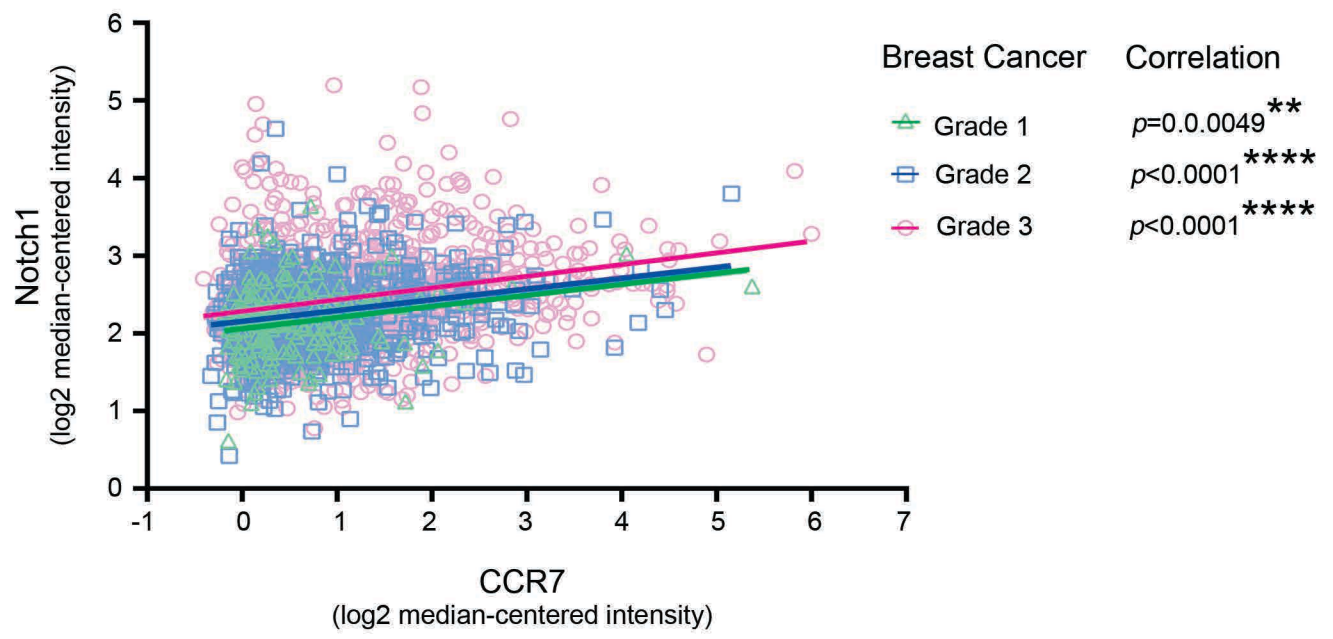

Supplement: MOESM1 [file 12030058]
